# Supplementary material for: Stable aerobic and anaerobic coexistence in anoxic marine zones
Source: PubMed Central journal article supplement (PMC6908664; doi:10.1038/s41396-019-0523-8), 2019-10-17
Supplement: 41396_2019_523_MOESM1_ESM.pdf [file 41396_2019_523_MOESM1_ESM.pdf]

# Supplementary Information: Stable aerobic and anaerobic coexistence in anoxic marine zones

Zakem et al.

## 1 **Appendix 1: Derivation of $\phi$**

2 The concentration of aerobic biomass from the steady state balance of Eqn. T4 ( $\frac{dO_2}{dt} = 0$ ) is:

$$B_O = \frac{D}{\mu_O} (O_{2in} - O_2^*) y_{O_2} \quad (\text{A1})$$

3 Thus, for aerobic biomass to exist,  $O_{2in} > O_2^*$ .

4 The relationship of the steady state biomasses of both the aerobic and anaerobic populations from

5 Eqn. T3 ( $\frac{dOM}{dt} = 0$ ) is:

$$0 = D(OM_{in} - OM_N^*) - \frac{1}{y_{OM_O}} \mu_O B_O - \frac{1}{y_{OM_N}} \mu_N B_N \quad (\text{A2})$$

6 The organic matter subsistence concentration for anaerobic biomass  $OM_N^*$  is the relevant subsistence

7 concentration for this expression, since we are working towards an expression for the coexistence

8 of both populations, and this is the larger. (If  $OM_{in} < OM_N^*$  and  $OM_{in} \geq OM_O^*$ , aerobic but

9 not anaerobic biomass can accumulate.) Since  $\mu = D$  at steady state in the chemostat, further

10 simplification can be made for the chemostat, but we retain these values in order to later extend the

11 expression to natural environments.

12 Plugging Eqn. A1 into Eqn. A2, rearranging gives an expression for anaerobic biomass:

$$B_N = y_{OM_N} D(OM_{in} - OM_N^*) - \frac{y_{OM_N}}{y_{OM_O}} D(O_{2in} - O_2^*) y_{O_2} \quad (\text{A3})$$

Thus, for anaerobic biomass to exist,

$$0 < D(OM_{in} - OM_N^*) - \frac{y_{O_2}}{y_{OM_O}} D(O_{2in} - O_2^*) \quad (\text{A4})$$

$$\frac{y_{O_2}}{y_{OM_O}} D(O_{2in} - O_2^*) < D(OM_{in} - OM_N^*) \quad (\text{A5})$$

$$\frac{y_{O_2}}{y_{OM_O}} \frac{D(O_{2in} - O_2^*)}{D(OM_{in} - OM_N^*)} < 1 \quad (\text{A6})$$

13 In the main text, we label the LHS expression as  $\phi$ , and thus the threshold  $\phi = 1$  is relevant for  
 14 identifying the domain of coexistent aerobic and anaerobic biomass. We also use  $r$  to represent the  
 15 ratio of oxygen to organic matter demand:  $r = y_{OM_O} y_{O_2}^{-1}$  (mol  $O_2$  utilized per mol  $OM$  utilized),  
 16 and so:

$$\phi = \frac{D(O_{2in} - O_2^*)}{D(OM_{in} - OM_N^*)} r^{-1} \quad (\text{A7})$$

## 17 **Appendix 2: Redox-based descriptions of metabolisms**

18 Following the methodology of Rittman and McCarty (2001), three half-reactions combine to form  
19 the catabolic and anabolic full reactions for each metabolism: 1. the oxidation of an electron  
20 donor, 2. the reduction of oxygen or nitrogen as an electron acceptor, and 3. biomass synthesis.  
21 Electron fraction parameter  $f$  partitions the electron flow towards biomass synthesis ( $f$ ) vs. towards  
22 respiration for energy ( $1 - f$ ).

23 We describe the N-cycling in AMZs using a minimum set of metabolisms, described below. Though  
24 natural assemblages may carry out a diversity of pathway lengths of the full denitrification reaction  
25 (Zumft 1997), we here resolve the denitrification pathway with two discrete steps, as do other  
26 modeling approaches (Penn et al. 2016; Babbin et al. 2017), because the intermediate  $\text{NO}_2^-$  is  
27 critical to AMZ biogeochemistry. We do not resolve  $\text{N}_2\text{O}$  because the small amounts formed have  
28 negligible impact on the stoichiometries of these metabolisms. We do not consider anaerobic nitrite  
29 oxidation because our understanding the process is still emerging (Babbin et al. 2017), though we  
30 provide the tools with which the traits and ecology of this (and other) metabolisms could also be  
31 examined.

**Aerobic heterotrophy** For the aerobic heterotroph, organic matter ( $OM$ ) provides the elements and electrons for both the synthesis of biomass ( $B$ ) and energy production, and oxygen serves as the electron acceptor. The three half-reactions, with notation of the factor by which each is multiplied

before summing to give the whole metabolism, are:

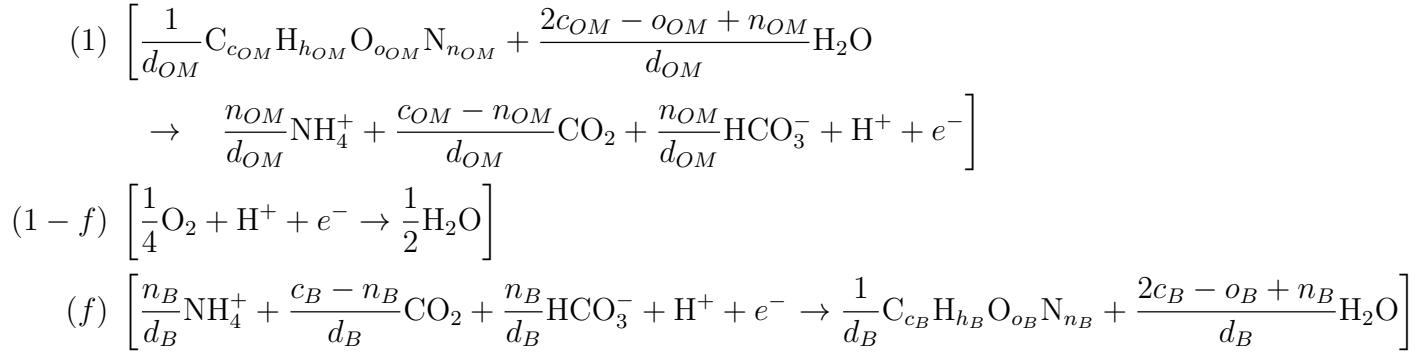

32 Summing the above gives the balance for the whole metabolism, here substituting organic matter  
 33  $OM = C_{c_{OM}} H_{h_{OM}} O_{o_{OM}} N_{n_{OM}}$  and biomass  $B_{HetO} = C_{c_B} H_{h_B} O_{o_B} N_{n_B}$ , and ignoring water and  
 34 lumping bicarbonate into the  $CO_2$  pool for brevity, as:

$$\frac{1}{d_{OM}} OM + \frac{1-f}{4} O_2 \rightarrow \frac{f}{d_B} B_{HetO} + \left( \frac{c_{OM}}{d_{OM}} - \frac{c_B f}{d_B} \right) CO_2 + \left( \frac{n_{OM}}{d_{OM}} - \frac{n_B f}{d_B} \right) NH_4^+ \quad (A8)$$

35 where  $d$  normalizes the organic reactions to one electron. In the half-reactions for organic matter  
 36 decomposition or biomass synthesis,  $d$  represents the number of electron equivalents that correspond  
 37 to the oxidation states of the inorganic constituents (Rittman and McCarty 2001). For generic  
 38 organic composition  $C_c H_h O_o N_n$ , assuming that organic N is decomposed into or assimilated from  
 39 N at oxidation state -3 gives  $d = 4c + h - 2o - 3n$ . (Different values of  $d$  may account for the  
 40 assimilation of DIN species at higher oxidation states into biomass, following Rittman and McCarty  
 41 (2001)). Here, we assume a microbial biomass composition of  $C_5 H_7 O_2 N$  for all functional types, in  
 42 accordance with the estimate of marine heterotrophic bacterial biomass C:N of  $5 \pm 1$  (Zimmerman  
 43 et al. 2014), giving  $d_B = 20$ . For the generic organic substrate, we assume an average Redfieldian  
 44 composition of  $OM = C_{6.6} H_{10.9} O_{2.6} N$  (Anderson 1995), giving  $d_{OM} = 29.1$ .

45 The organic matter yield (or growth efficiency; mol  $B$  synthesized per mol  $OM$  consumed) relates  
 46 to  $f$  as:

$$y_{OM} = \frac{d_{OM}}{d_B} f \quad (A9)$$

47 and so  $y_{OM} \approx f$  if the stoichiometries and redox states of the organic matter substrate and microbial  
 48 biomass are similar, and  $y_{OM} = 1.45f$  for our assumed Redfieldian organic substrate and microbial  
 49 biomass stoichiometries.

50 For the aerobic heterotroph, we assign  $y_{OM_{BhetO}} = 0.14$ , the average marine growth efficiency in the  
 51 open ocean compiled by Robinson (2008). This translates to  $f = 0.096$ , and gives a stoichiometry  
 52 normalized to one mole of biomass as:

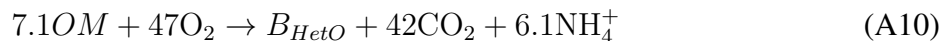

53 For the following anaerobic heterotrophic metabolisms, the above half-reactions are the same except  
 54 for the electron acceptor half-reaction. For the anaerobic heterotrophs, we assign the same organic  
 55 matter yield to all:  $y_{OM_{Bhet_i}} = 0.9y_{OM_{BhetO}}$ , giving  $f = 0.087$ , in accordance with our assumption  
 56 that oxygen is a superior electron acceptor for the range of oxygen concentrations resolved for  
 57 our generic organic substrate. LaRowe and Van Cappellen (2011) show that this may be so for  
 58 a wide range of oxygen and DIN concentrations for the oxidation of glucose. This allows the  
 59 anaerobic types to coexist in the steady state model. Further attention to time-varying states is  
 60 needed to explain coexistences among anaerobic heterotrophic types if organic matter yields differ  
 61 significantly.

62 We also note how ratio  $r$  in the equations for  $\phi$  can be written in terms of  $f$ . Since  $r = y_{OM_O}y_{O_2}^{-1}$   
 63 (mol  $O_2$  utilized per mol  $OM$  utilized),

$$r = \frac{d_{OM}(1 - f)}{4} \quad (A11)$$

64 Thus  $r$  increases as  $f$  decreases, and converges to  $d_{OM}/4$  at low efficiencies (Fig. A1). With our  
 65 assumed organic matter stoichiometry,  $r$  is about 6.6 mol  $O_2$  per mol organic N, or about 1 mol  $O_2$   
 66 per mol organic C, which is close to the inverse of the “respiratory quotient” for algal material of  
 67 0.9 moles of  $CO_2$  produced per mol  $O_2$  consumed (Robinson 2008).

**Nitrate-reducing heterotrophy** For  $\text{NO}_3^-$  reduction to  $\text{NO}_2^-$ , organic matter ( $OM$ ) provides the elements and electrons for both the synthesis of biomass ( $B$ ) and energy production, and  $\text{NO}_3^-$  serves as the electron acceptor. The full metabolism forming biomass  $B_{HetNO_3}$  is:

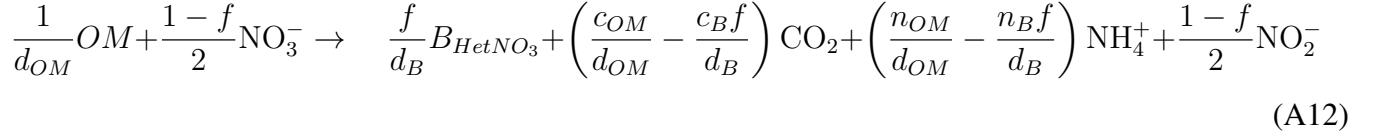

68 With  $f = 0.087$ , the stoichiometry normalized to one mole of biomass is:

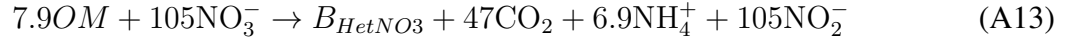

69 **Denitrifying heterotrophy** For the denitrification of  $\text{NO}_2^-$  to gaseous elemental form, organic  
 70 matter ( $OM$ ) provides the elements and electrons for both the synthesis of biomass ( $B$ ) and energy  
 71 production, and either  $\text{NO}_3^-$  or  $\text{NO}_2^-$  serves as the electron acceptor, which is then reduced to an  
 72 unspecified combination of  $\text{N}_2$  and  $\text{N}_2\text{O}$ . Using  $\text{NO}_3^-$  as an electron acceptor (as in Fig. 2 in main  
 73 text), the full metabolism forming biomass  $B_N$  is:

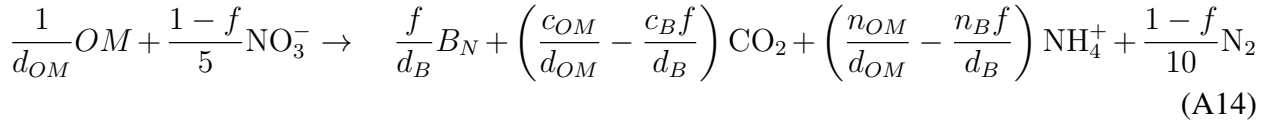

74 With  $f = 0.087$ , the stoichiometry normalized to one mole of biomass is:

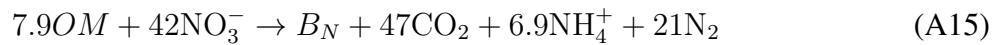

75 Using  $\text{NO}_2^-$  as an electron acceptor (all but Fig. 2 in main text), the full metabolism forming biomass  
 76  $B_{HetNO_2}$  is:

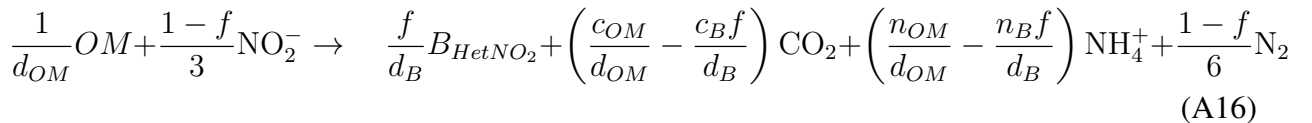

77 With  $f = 0.087$ , the stoichiometry normalized to one mole of biomass is:

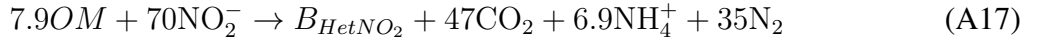

78 **DNRA** For organisms carrying out dissimilatory nitrate (or nitrite) reduction to ammonium  
 79 (DNRA), organic matter ( $OM$ ) provides the elements and electrons for both the synthesis of  
 80 biomass ( $B$ ) and energy production, and either  $NO_3^-$  or  $NO_2^-$  serves as the electron acceptor,  
 81 which is reduced to  $NH_4^+$ . When using  $NO_3^-$  as an electron acceptor, the full metabolism can be  
 82 approximated as:

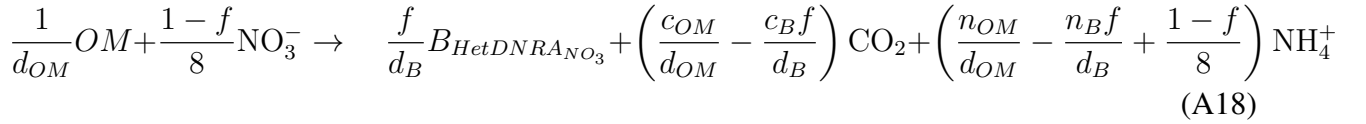

83 For the  $f = 0.087$  assumed for all anaerobic heterotrophs, the stoichiometry normalized to one  
 84 mole of biomass is:

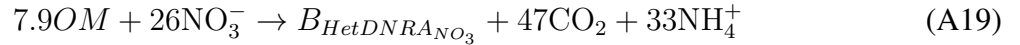

85 When using  $NO_2^-$  as an electron acceptor for DNRA, the full metabolism can be approximated as:

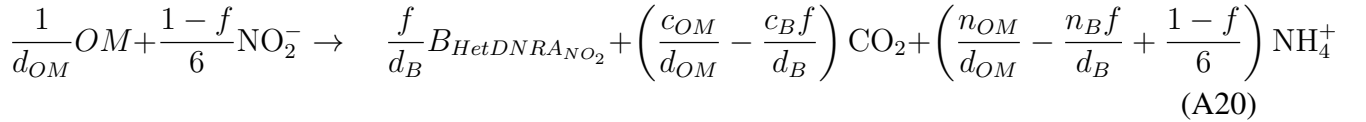

86 and with  $f = 0.087$ , the stoichiometry normalized to one mole of biomass is:

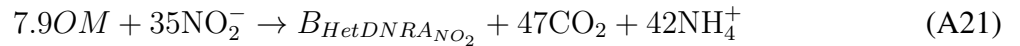

87 Solutions including both of these metabolisms as metabolic functional types in the chemostat are  
 88 plotted in Fig. A3 and discussed in Appendix 3.

**Chemoautotrophic aerobic  $\text{NH}_4^+$  oxidation** For the  $\text{NH}_4^+$  oxidizer (here considering  $\text{NH}_4^+$  and  $\text{NH}_3$  interchangeably), as in Zakem et al. (2018), the three half-reactions, for generic biomass  $\text{C}_c\text{H}_h\text{O}_o\text{N}_n$ , and their electron-partitioning coefficients, are:

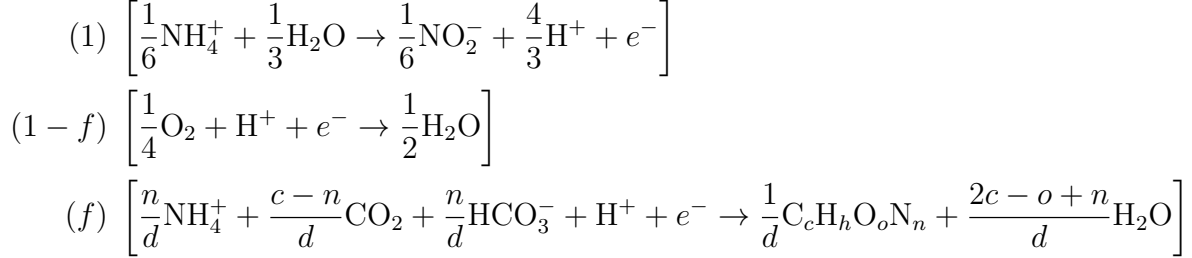

89 The sum gives the full metabolism for  $\text{NH}_4^+$ -oxidizing biomass  $B_{AOO}$ , as a function of  $f$ :

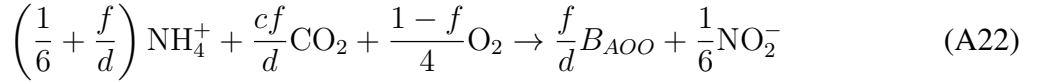

90 For  $f = 0.03$ , the stoichiometry normalized to one mole of biomass is:

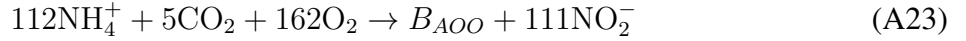

**Chemoautotrophic aerobic  $\text{NO}_2^-$  oxidation** For the  $\text{NO}_2^-$  oxidizer, as in Zakem et al. (2018), the three half-reactions are:

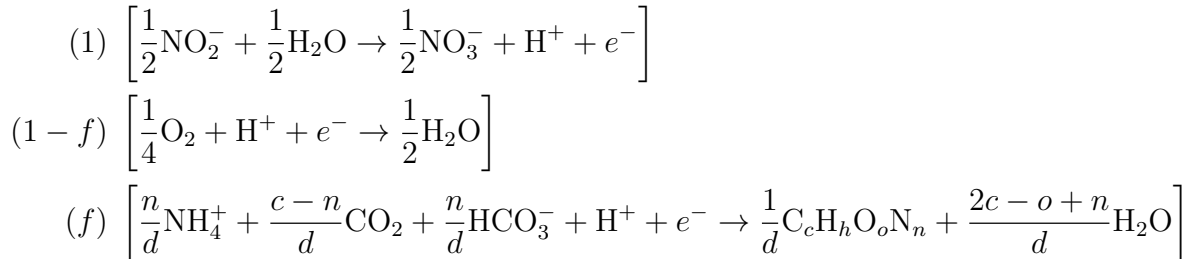

91 which when summed gives the full metabolism  $\text{NO}_2^-$ -oxidizing biomass  $B_{NOO}$  as:

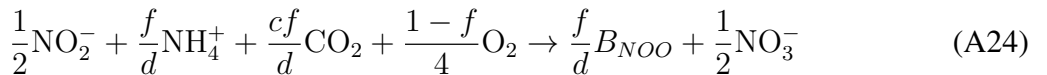



92 where the requirement of one mole of  $\text{NH}_4^+$  per mole NOO biomass is effectively negligible in all  
 93 model simulations. For  $f = 0.03$ , the stoichiometry normalized to one mole of biomass is:

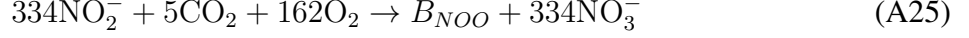

**Chemoautotrophic anammox** For chemoautotrophic anaerobic ammonium oxidation (anammox),  $\text{NH}_4^+$  oxidation to elemental N provides electrons for energy that fuels cell synthesis (here considering  $\text{NH}_4^+$  and  $\text{NH}_3$  interchangeably), and  $\text{NO}_2^-$  serves as the electron acceptor, forming elemental  $\text{N}_2$ . Anammox is observed to also excrete  $\text{NO}_3^-$  (Strous et al. 1998). Thus, the whole metabolism may be characterized by considering two electron donor half reactions for  $\text{NH}_4^+$ : oxidation to  $\text{NO}_3^-$  and oxidation to  $\text{N}_2$ . With this simplified form, the following four half-reactions can represent the anammox metabolism, with  $x$  dictating the weighting of the electron donor reaction:

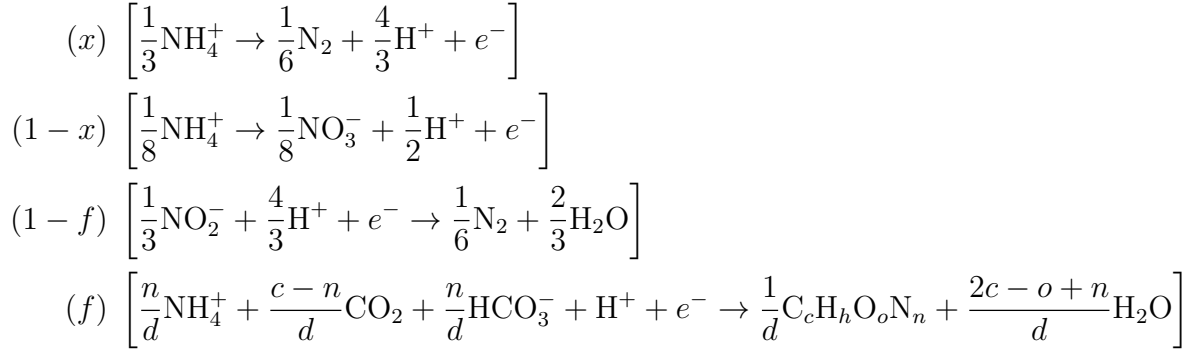

94 This gives the full metabolism forming anammox biomass  $B_{\text{anx}}$  as:

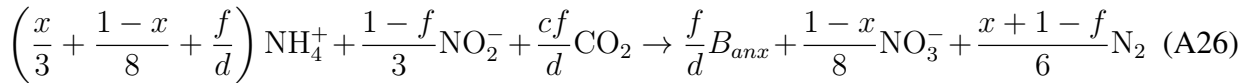

95 To estimate an appropriate value for  $x$ , we calibrate this with the stoichiometry of anammox in  
 96 wastewater reported by Strous et al. (1998). Normalized to one mole of N-based biomass for  
 97 comparison, this published stoichiometry is:

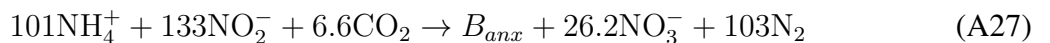

98 This shows that anammox produces  $\text{NO}_3^-$  to  $\text{N}_2$  at a ratio of approximately 1:4. From this, we  
 99 can solve for  $x \approx 0.5$ . With  $x = 0.5$ , we find that the stoichiometry of Strous et al. (1998) is  
 100 approximated when the value of  $f$  is 0.05:

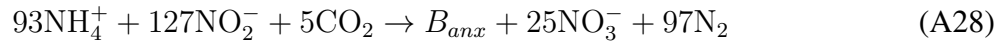

101 However, for all three chemoautotrophic metabolic functional types, we assume  $f = 0.03$  in the  
 102 illustrated solutions. This is because Zakem et al. (2018) used theoretical and empirical analysis to  
 103 estimate that the electron fraction  $f$  for both steps of aerobic nitrification was significantly lower  
 104 in marine environments ( $f \approx 0.03$ ) than in wastewater ( $f \approx 0.1$ ). Furthermore, the published  
 105 stoichiometry for anammox in wastewater suggests value of  $f$  lower than those of aerobic ammonia  
 106 oxidation in wastewater ( $f \approx 0.05$ ) (Strous et al. 1998; Rittman and McCarty 2001). Thus if the  
 107 degree to which anammox efficiency is lower than aerobic nitrifier efficiency in the ocean can be  
 108 approximated by the ratio of anammox to nitrifier efficiency in wastewater (0.05:0.1), a value of  
 109  $f \approx 0.03/2 \approx 0.015$  may be a justifiable estimate for anammox efficiency in the ocean. However,  
 110 given the uncertainty, and to most robustly test the competition between them, we assigned the  
 111 same value of  $f = 0.03$  to anammox as well as to the nitrifiers. With  $f = 0.03$  and  $x = 0.5$ , the  
 112 anammox stoichiometry is:

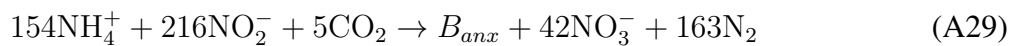

113 **Appendix 3: Detail for the multiple redox-based metabolisms in the virtual**

114 **chemostat**

**Equations** Equations for the multiple metabolisms in the chemostat are similar in form to those in Table 1 in the main text. Organic matter,  $O_2$ , and  $NO_3^-$  are supplied to chemostat. The biomass  $B_i$  ( $\mu\text{M N}$ ) of each metabolic functional type  $i$ , organic matter ( $\mu\text{M N}$ ), and all nutrients ( $\mu\text{M}$ ) are resolved by solving their rates of change with time defined by incoming nutrient supply, nutrient uptake, growth rate, excretion of waste respiration products, and the chemostat dilution rate  $D$  as:

$$\frac{dB_i}{dt} = B_i(\mu_i - D) \quad (\text{A30})$$

$$\frac{dOM}{dt} = D(OM_{in} - OM) - \sum_i \frac{1}{y_{OM_i}} \mu_i B_i \quad (\text{A31})$$

$$\frac{d[NH_4^+]}{dt} = \sum_i e_{NH_{4i}} \mu_i B_i - \sum_i \frac{1}{y_{NH_{4i}}} \mu_i B_i - D[NH_4^+] \quad (\text{A32})$$

$$\frac{d[NO_2^-]}{dt} = \sum_i e_{NO_{2i}} \mu_i B_i - \sum_i \frac{1}{y_{NO_{2i}}} \mu_i B_i - D[NO_2^-] \quad (\text{A33})$$

$$\frac{d[NO_3^-]}{dt} = \sum_i e_{NO_{3i}} \mu_i B_i - \sum_i \frac{1}{y_{NO_{3i}}} \mu_i B_i - D[NO_3^-] \quad (\text{A34})$$

$$\frac{d[O_2]}{dt} = D([O_{2in}] - [O_2]) - \sum_i \frac{1}{y_{O_{2i}}} \mu_i B_i \quad (\text{A35})$$

115 where yields  $y$  and excretion ratios  $e$  are listed in Table A1. Each growth rate  $\mu$  is calculated  
 116 according to Eqn. 1 in the main text using the yields and uptake kinetic parameters in Tables A1  
 117 and A2.

118 **Model ensemble** To consider uncertainty in the parameterizations, we computed an ensemble  
 119 of 1000 model simulations for which parameters were randomly sampled from a distribution as  
 120 follows. The efficiency of the heterotrophic metabolisms overall was varied, the degree to which  
 121 anaerobic heterotrophy was less efficient than aerobic heterotrophy was varied, and the efficiencies

122 of the three chemoautotrophic metabolisms were independently varied. Since we expect variation in  
123 these yields, but not the underlying energetic constraints, we vary the overall heterotrophic growth  
124 efficiency but retain the lower efficiency of the anaerobic heterotrophs. The aerobic heterotrophic  
125 yield  $y_{OM_{BhetO}}$  was varied over a linear range from 0.1 to 0.3 (mol biomass synthesized per mol  
126  $OM$  utilized). The anaerobic heterotrophic yields were less this yield by a factor of 1% to 50%,  
127 varying linearly over this range. The three chemoautotrophic yields were independently varied by  
128 varying their electron fraction  $f$  over a linear range from  $f = 0.02$  to  $f = 0.04$ . This allowed the  
129 potential for cases in which the anammox  $NH_4^+$  yield was higher than that of the aerobic  $NH_4^+$   
130 oxidizer, potentially resulting in sustainable anammox in the oxygenated state, but this case did not  
131 occur in any of the 1000 solutions.

132 **An argument for low efficiency of DNRA** The model solutions without DNRA are illustrated  
133 in the main text (Fig. 3), and with DNRA in Fig. A3. When the DNRA functional type is included,  
134  $NH_4^+$  but not  $NO_2^-$  accumulates to micromolar concentrations in the anoxic state (Fig. A3). This is  
135 consistent with some observations in the South Pacific oxygen minimum zone of Kalvelage et al.  
136 (2013): at the few locations where measured DNRA rates were significantly high (10–1000  $nM$   
137  $d^{-1}$ ),  $NH_4^+$  concentrations were also significantly high (1–5  $\mu M$ ), and  $NO_2^-$  concentrations were low.  
138 Since DNRA rates were low throughout the rest of the dataset (less than about 1  $nM d^{-1}$ ), and since  
139 in general AMZs show characteristic accumulation of  $NO_2^-$  and not  $NH_4^+$ , with an assessment of the  
140 literature we agree with the speculation that DNRA operates sporadically in AMZs (Lam et al. 2009;  
141 Jensen et al. 2011; Füssel et al. 2012; Kalvelage et al. 2013). The specific mechanism sustaining  
142 DNRA remains unclear, but this does hypothesize that DNRA may be associated with a lower  
143 efficiency than other anaerobic metabolisms. In the steady state solutions, DNRA is excluded if its  
144 efficiency is lower, and so we further speculate that favorable DNRA may require a time-varying  
145 environment to avoid competitive exclusion as an ‘r-selected’ vs. a ‘k-selected’ metabolism.

**Table A1:** Parameters for metabolic functional type yields  $y$  (inverse values listed) and excretions  $e$  from redox-based descriptions (see chemical equations in Appendix B). Units for  $y^{-1}$  and  $e$  are mol substrate per mol biomass N synthesized.

| Type                                                              | Parameter                                      | Symbol                             | Value (mol/mol) | Source                                             |
|-------------------------------------------------------------------|------------------------------------------------|------------------------------------|-----------------|----------------------------------------------------|
| <b>Two metabolisms (Fig. 2 case study):</b>                       |                                                |                                    |                 |                                                    |
| $B_O$                                                             | Organic matter demand                          | $y_{OM_{B_O}}^{-1}$                | 7.1             | Robinson (2008)                                    |
|                                                                   | Oxygen demand                                  | $y_{O_2}^{-1}$                     | 47              | Eqns. A8 and A9                                    |
| $B_N$                                                             | Organic matter demand                          | $y_{OM_{B_N}}^{-1}$                | 7.9             | $y_{OM_N} = 0.9 \cdot y_{OM_O}$                    |
|                                                                   | DIN demand                                     | $y_N^{-1}$                         | 42              | Eqns. A9 and A14                                   |
| <b>Multiple metabolisms (Fig. 3, for chemostat and 2D model):</b> |                                                |                                    |                 |                                                    |
| $B_{HetO}$                                                        | Organic matter demand                          | $y_{OM_{B_{HetO}}}^{-1}$           | 7.1             | Robinson (2008)                                    |
|                                                                   | Oxygen demand                                  | $y_{O_2_{B_{HetO}}}^{-1}$          | 47              | Eqns. A8 and A9                                    |
|                                                                   | Ammonium excretion                             | $e_{NH_4_{B_{HetO}}}$              | 6.1             | Eqns. A8 and A9                                    |
| $B_{HetNO_3}$                                                     | Organic matter demand                          | $y_{OM_{B_{HetNO_3}}}^{-1}$        | 7.9             | $y_{OM_{B_{Het_i}}} = 0.9 \cdot y_{OM_{B_{HetO}}}$ |
|                                                                   | Nitrate demand                                 | $y_{NO_3_{B_{HetNO_3}}}^{-1}$      | 105             | Eqns. A9 and A12                                   |
|                                                                   | Ammonium excretion                             | $e_{NH_4_{B_{HetNO_3}}}$           | 6.9             | Eqns. A9 and A12                                   |
|                                                                   | Nitrite excretion                              | $e_{NO_2_{B_{HetNO_3}}}$           | 105             | Eqns. A9 and A12                                   |
| $B_{HetNO_2}$                                                     | Organic matter demand                          | $y_{OM_{B_{HetNO_2}}}^{-1}$        | 7.9             | $y_{OM_{B_{Het_i}}} = 0.9 \cdot y_{OM_{B_{HetO}}}$ |
|                                                                   | Nitrite demand                                 | $y_{NO_2_{B_{HetNO_2}}}^{-1}$      | 70              | Eqns. A9 and A16                                   |
|                                                                   | Ammonium excretion                             | $e_{NH_4_{B_{HetNO_2}}}$           | 6.9             | Eqns. A9 and A16                                   |
|                                                                   | N <sub>2</sub> (or N <sub>2</sub> O) excretion | $e_{N_2_{B_{HetNO_2}}}$            | 35              | Eqns. A9 and A16                                   |
| $B_{AOO}$                                                         | Ammonium demand                                | $y_{NH_4_{B_{AOO}}}^{-1}$          | 112             | $f = 0.03$ ; Zakem et al. (2018)                   |
|                                                                   | Oxygen demand                                  | $y_{O_2_{B_{AOO}}}^{-1}$           | 162             | Eqn. A22                                           |
|                                                                   | Nitrite excretion                              | $e_{NO_2_{B_{AOO}}}$               | 111             | Eqn. A22                                           |
| $B_{NOO}$                                                         | Nitrite demand                                 | $y_{NO_2_{B_{NOO}}}^{-1}$          | 334             | $f = 0.03$ ; Zakem et al. (2018)                   |
|                                                                   | Oxygen demand                                  | $y_{O_2_{B_{NOO}}}^{-1}$           | 162             | Eqn. A24                                           |
|                                                                   | Nitrate excretion                              | $e_{NO_3_{B_{NOO}}}$               | 334             | Eqn. A24                                           |
| $B_{anx}$                                                         | Ammonium demand                                | $y_{NH_4_{B_{anx}}}^{-1}$          | 154             | $f = 0.03$                                         |
|                                                                   | Nitrite demand                                 | $y_{NO_2_{B_{anx}}}^{-1}$          | 216             | Eqn. A26                                           |
|                                                                   | Nitrate excretion                              | $e_{NO_3_{B_{anx}}}$               | 42              | Eqn. A26, $x = 0.5$                                |
|                                                                   | N <sub>2</sub> excretion                       | $e_{N_2_{B_{anx}}}$                | 163             | Eqn. A26, $x = 0.5$                                |
| <b>DNRA (included in Fig. A3 only):</b>                           |                                                |                                    |                 |                                                    |
| $B_{HetDNRA_{NO_3}}$                                              | Organic matter demand                          | $y_{OM_{B_{HetDNRA-NO_3}}}^{-1}$   | 7.9             | $y_{OM_{B_{Het_i}}} = 0.9 \cdot y_{OM_{B_{HetO}}}$ |
|                                                                   | Nitrate demand                                 | $y_{NO_3_{B_{HetDNRA-NO_3}}}^{-1}$ | 26              | Eqns. A9 and A18                                   |
|                                                                   | Ammonium excretion                             | $e_{NH_4_{B_{HetDNRA-NO_3}}}$      | 33              | Eqns. A9 and A18                                   |
| $B_{HetDNRA_{NO_2}}$                                              | Organic matter demand                          | $y_{OM_{B_{HetDNRA-NO_2}}}^{-1}$   | 7.9             | $y_{OM_{B_{Het_i}}} = 0.9 \cdot y_{OM_{B_{HetO}}}$ |
|                                                                   | Nitrite demand                                 | $y_{NO_2_{B_{HetDNRA-NO_2}}}^{-1}$ | 35              | Eqns. A9 and A20                                   |
|                                                                   | Ammonium excretion                             | $e_{NH_4_{B_{HetDNRA-NO_2}}}$      | 42              | Eqns. A9 and A20                                   |

**Table A2:** Uptake kinetic parameters for metabolic functional types.

| Substrate | Parameter                                   | Symbol        | Value (mol/mol $B$ ) | Units                           | Source                                                   |
|-----------|---------------------------------------------|---------------|----------------------|---------------------------------|----------------------------------------------------------|
| $OM$      | Maximum uptake rate                         | $V_{maxOM}$   | 1 (0.5 in 2D)        | mol $OM$ mol $B^{-1}$ d $^{-1}$ | *                                                        |
|           | Half-saturation conc.                       | $K_{OM}$      | 0.1 (0.01 in 2D)     | $\mu$ M $OM$                    |                                                          |
| DIN       | Maximum uptake rate                         | $V_{maxN}$    | 50.8                 | mol N mol $B^{-1}$ d $^{-1}$    | Martens-Habbena et al. (2009); Zakem et al. (2018)       |
|           | Half-saturation conc.                       | $K_N$         | 133                  | nM N                            |                                                          |
| $O_2$     | Cell radius                                 | $r$           | 0.25                 | $\mu$ m                         | Bratbak and Dundas (1984)<br>Unisense Seawater and Gases |
|           | Cell C quota**                              | $q$           | 18.3                 | fmol C $\mu$ m $^{-3}$          |                                                          |
|           | Diffusion coefficient for $O_2$ in seawater | $\mathcal{D}$ | $1.5 \cdot 10^{-5}$  | cm $^2$ s $^{-1}$               |                                                          |

\*The kinetic parameters for organic matter uptake rate were estimated from the average marine bacterial growth efficiency of order 0.1 d $^{-1}$  with the estimate of the average bulk marine bacterial growth rate of order 0.1 d $^{-1}$ . A maximum uptake rate of  $V_{maxOM} \approx 1$  allows this growth rate when organic matter is abundant. The chosen half-saturation constant is arbitrarily chosen to allow for depletion of the average (non-recalcitrant) organic matter pool.

\*\*A C:N of 5 for microbial biomass is used to express yields in units of biomass N.

## 146 **Appendix 4: 2D model detail**

### 147 **Flow field**

148 **Governing Equations** A two-dimensional, basin-wide closed flow field is developed (in the  $x - z$   
149 plane with no gradients in  $y$ ) using the governing momentum equations:

$$\frac{\partial u}{\partial t} = -u \frac{\partial u}{\partial x} - w \frac{\partial u}{\partial z} - \frac{1}{\rho_0} \frac{\partial p}{\partial x} + fv + \nabla \cdot \kappa \nabla u \quad (\text{A36})$$

150

$$\frac{\partial v}{\partial t} = -u \frac{\partial v}{\partial x} - w \frac{\partial v}{\partial z} - fu + \nabla \cdot \kappa \nabla v \quad (\text{A37})$$

151 A wind stress in the  $y$  direction,  $\tau = (0, \tau^y)$ , is imposed by the surface boundary condition  
152  $\kappa \frac{\partial v}{\partial z} = \tau^y / \rho$ , where  $\rho$  is the density of seawater. With horizontal  $u$  computed, a non-divergent 2D  
153 circulation field can be computed from continuity as:

$$\frac{\partial u}{\partial x} + \frac{\partial w}{\partial z} = 0 \quad (\text{A38})$$

154 and integrating downwards (or upwards) to solve for the vertical velocity field  $w$ , with  $w = 0$  as the  
155 top (or bottom) boundary condition.

156 **The Pressure Field** The wind-driven Ekman transport in the  $x$ -direction sets up an overturning  
157 circulation through the horizontal pressure gradient. Assuming the pressure to be hydrostatic, the  
158 horizontal pressure gradient can be decomposed into the baroclinic pressure gradient, calculated  
159 from density anomalies, and the surface pressure gradient, arising from deviations in sea surface  
160 height. In this 2D circulation model, temperature and salinity are not resolved, and density anomalies  
161 are set to zero throughout the domain. Thus the horizontal pressure gradient is depth-independent

162 and consists of only the surface pressure gradient, as:

$$\frac{\partial p}{\partial x} = \frac{\partial p_{surf}}{\partial x} \quad (\text{A39})$$

163 Using the rigid lid approximation as a constraint, the total flux in and out of each water column  
 164 must sum to zero, and can be expressed in discretized form as:

$$\sum_{j=1}^{n_j} (u_{j,i+1} - u_{j,i}) dz_j = 0, \quad (\text{A40})$$

165 where the grid cell index  $i$  refers to the  $x$ -direction,  $j$  to the  $z$ -direction, and  $dz$  is the height of the  
 166 grid cell. Substituting Eqn. A39 into Eqn. A36 (momentum in the  $x$ -direction) and then inserting  
 167 this into Eqn. A40 allows for solving the horizontal surface pressure derivative. For a boundary  
 168 condition,  $\frac{\partial p}{\partial x} = 0$  was imposed on the left (or right) boundary, and the pressure gradient was solved  
 169 for at the face of each column by integrating from left to right (or right to left), which resulted  
 170 in an analogous boundary pressure gradient of zero at the far boundary. The  $u$  velocity was then  
 171 calculated with the newly updated pressure gradient at each time step, and checked for consistency  
 172 with Eqn. A40.

173 **Wind Stress Forcing** The  $y$ -component of the wind stress was modeled to simulate the climato-  
 174 logical mean from Hellerman and Rosenstein (1983) over the Pacific Basin at  $10^\circ\text{S}$  latitude (Fig.  
 175 A4) as:

$$\tau_y(x) = 0.0125 \left( \sin\left(\frac{\pi x}{0.8L} - \frac{\pi}{2}\right) + 1 \right) \left( -\tanh\left(\frac{\pi x}{0.1L} - 9\pi\right) + 1 \right) \quad (\text{A41})$$

176 where  $L$  is the length of the domain (10,000 km).

177 **Mixing** A mixed layer was imposed by varying the vertical diffusion coefficient  $\kappa_Z$  with depth,  
 178 from a maximum  $\kappa_{Zmax}$  at the surface to a minimum  $\kappa_{Zmin}$  with a length scale of  $z_{ML}$ . The fixed  
 179 (no flux) boundary conditions result in some accumulation of  $POM$  at the bottom of the 2000 m



180 domain, conceptually representing a sediment layer. To diffuse this sediment layer, vertical mixing  
 181 was increased within a bottom boundary mixed layer of depth scale 100 m.  $\kappa_Z$  ( $\text{m}^2 \text{s}^{-1}$ ) is thus  
 182 calculated at cell faces as:

$$\kappa_Z = \kappa_{Zmax} e^{-\frac{z}{z_{mld}}} + \kappa_{Zmin} + \kappa_{Zmax} e^{-\frac{z-H}{100}} \quad (\text{A42})$$

183 where  $z$  is in meters and  $H$  is the height of the domain (2000 m). A constant value of horizontal  
 184 diffusion  $\kappa_X$  was prescribed to account for mixing by subgrid-scale processes.

185 **Numerical solution** The momentum equations were solved to calculate the flow field with 10  
 186 m vertical resolution and 100 km horizontal resolution over a domain 2000 m in height and  
 187 10,000 km in width. The choice to resolve the time step explicitly led to the need to resolve gravity  
 188 waves, and so a  $10^{-3}$  day time step was necessary. Equations were integrated forward in time  
 189 using the 4th order Runge-Kutta method. Advection was carried out using the QUICK advection  
 190 scheme, consisting of a linear interpolation between points weighted by an upstream 2nd order  
 191 curvature, resulting in 3rd order accuracy. Fluxes were calculated at the faces of each grid cell, and  
 192 concentrations at the centers. The resulting  $u$  and  $w$  fields used for the biogeochemistry model were  
 193 saved after 100 years of spin up.

## 194 **Biogeochemistry**

195 The idealized AMZ biogeochemical model includes 17 state variables (11 populations and 6  
 196 nutrients): the biomasses of the microbial metabolic functional type populations from the chemo-  
 197 stat model ( $B_{HetO}$ ,  $B_{AOO}$ ,  $B_{NOO}$ ,  $B_{HetNO_3}$ ,  $B_{HetNO_2}$ , and  $B_{anx}$ ), two phytoplankton populations  
 198 (smaller  $P_S$  and larger  $P_L$ ), three zooplankton grazer populations (microzooplankton microbial  
 199 grazer  $Z_B$ , and one each preying on the phytoplankton populations,  $Z_{P_S}$  and  $Z_{P_L}$ ), dissolved organic  
 200 matter ( $DOM$ ), sinking particulate organic matter ( $POM$ ), three inorganic species of DIN ( $\text{NH}_4^+$ ,  
 201  $\text{NO}_2^-$ , and  $\text{NO}_3^-$ ), and oxygen ( $\text{O}_2$ ). All are resolved in concentrations of nitrogen except for  $\text{O}_2$ .

202 Total nitrogen (the sum of all nutrients, organic matter, and biomasses) is conserved. The DIN  
 203 transformed to gaseous form (as  $\text{N}_2\text{O}$  or  $\text{N}_2$ ) is balanced by immediately redistributing its sum  
 204 evenly over the domain as nitrate, which simulates a distant source of nitrogen fixation. Oxygen  
 205 fluxes across the air-sea interface according to transfer coefficient of  $\kappa_g$  over equilibration depth  $h_g$   
 206 according to a saturation concentration  $\text{O}_{2sat}$ . See Table A3 for parameter values.

207 Each tracer  $C$  is advected and diffused by the two-dimensional velocity field  $\mathbf{u} = (u, w)$  and  
 208 diffusion coefficients  $\kappa$  as:

$$\frac{\partial C}{\partial t} = -\nabla \cdot (\mathbf{u}C) + \nabla \cdot (\kappa \nabla C) + S_C \quad (\text{A43})$$

209 where  $S_C$  are additional sources and sinks. Growth rate  $\mu_i$  for each microbial population is calculated  
 210 with Eqn. 1, using the yields and uptake kinetic parameters in Tables A1 and A2, and modified by  
 211 temperature by  $\gamma_T$  (Eqn. A60; Table A3). For each of the 17 tracers, the sources and sinks are as  
 212 follows:

$$S_{B_i} = B_i(\mu_i - m_{lin} - m_q B_i - g Z_B) \quad (A44)$$

$$S_{P_i} = P_i(\mu_i - m_{lin} - m_q P_i - g Z_{P_i} \frac{O_2}{O_2 + K_{O_2}}) \quad (A45)$$

$$S_{Z_B} = Z_B(\zeta g \sum_i B_i - m_Z Z_B) \quad (A46)$$

$$S_{Z_{P_i}} = Z_{P_i}(\zeta g P_i \frac{O_2}{O_2 + K_{O_2}} - m_Z Z_{P_i}) \quad (A47)$$

$$S_{POM} = f_{mort} \left[ m_{lin} \sum_i B_i + m_{lin} \sum_i P_i + m_q \sum_i B_i^2 + m_q \sum_i P_i^2 + m_Z \sum_i Z_i^2 \right] \\ - \sum_i \frac{1}{y_{OM_i}} \mu_i B_i \frac{POM}{POM + DOM} - \frac{\partial(w_s POM)}{\partial z} \quad (A48)$$

$$S_{DOM} = (1 - f_{mort}) \left[ m_{lin} \sum_i B_i + m_{lin} \sum_i P_i + m_q \sum_i B_i^2 + m_q \sum_i P_i^2 + m_Z \sum_i Z_i^2 \right] \\ - \sum_i \frac{1}{y_{OM_i}} \mu_i B_i \frac{DOM}{POM + DOM} \quad (A49)$$

$$S_{NH_4^+} = \sum_i e_{NH_{4i}} \mu_i B_i - \sum_i \frac{1}{y_{NH_{4i}}} \mu_i B_i - \sum_i \mu_i P_i \frac{NH_4^+}{DIN} + (1 - \zeta)g \left[ \sum_i B_i Z_B + \sum_i P_i Z_{P_i} \frac{O_2}{O_2 + K_{O_2}} \right] \quad (A50)$$

$$S_{NO_2^-} = \sum_i e_{NO_{2i}} \mu_i B_i - \sum_i \frac{1}{y_{NO_{2i}}} \mu_i B_i - \sum_i \mu_i P_i \frac{NO_2^-}{DIN} \quad (A51)$$

$$S_{NO_3^-} = \sum_i e_{NO_{3i}} \mu_i B_i - \sum_i \frac{1}{y_{NO_{3i}}} \mu_i B_i - \sum_i \mu_i P_i \frac{NO_3^-}{DIN} + \frac{\iint (\sum_i e_{N_{2i}} \mu_i B_i) dx dz}{\iint dx dz} \quad (A52)$$

$$S_{O_2} = \frac{\kappa_g}{h_g} (O_{2sat} - O_2)^* + R_{O_{2P}} \sum_i \mu_i P_i - \sum_i \frac{1}{y_{O_{2i}}} \mu_i B_i - f(O_2, Z_B) - R_{O_{2Z}} (1 - \zeta)g \sum_i P_i Z_{P_i} \frac{O_2}{O_2 + K_{O_2}} \quad (A53)$$

213 \*over equilibration depth  $h_g$

214 **Phytoplankton** Two oxygenic phytoplankton types are resolved: one representing a small, high-  
 215 affinity *Prochlorococcus*-like population with a lower maximum growth rate and higher nutrient  
 216 affinity, and one representing a larger, faster growing type with lower affinity. Following Dutkiewicz  
 217 et al. (2015), light absorption for the smaller type is higher than that of the larger type, and so the  
 218 smaller type is more fit at lower light levels deeper in the water column. Both types produce oxygen  
 219 in relation to their growth with a Redfieldian O<sub>2</sub>:N ratio (7.3:1). Phytoplankton grow as a function  
 220 of a maximum growth rate  $\mu_{max}$  (d<sup>-1</sup>), with type-specific limitation by nutrients ( $\gamma_{N_i}$ ), type-specific  
 221 limitation by light ( $\gamma_{I_i}$ ), and modification by temperature ( $\gamma_T$ ) as:

$$\mu_{P_i} = \mu_{maxP_i} \gamma_{N_i} \gamma_{I_i} \gamma_T \quad (\text{A54})$$

222 Nutrient limitation is a function of the total concentration of all species of DIN:

$$\gamma_{N_i} = \min \left[ 1, \frac{\text{NH}_4^+}{\text{NH}_4^+ + K_{\text{NH}_4P_i}} + \frac{\text{NO}_2^-}{\text{NO}_2^- + K_{\text{NO}_xP_i}} + \frac{\text{NO}_3^-}{\text{NO}_3^- + K_{\text{NO}_xP_i}} \right] \quad (\text{A55})$$

223 The uptake of each DIN species by each phytoplankton type is weighted by the concentration  
 224 of each substrate. The inhibition of NO<sub>2</sub><sup>-</sup> and NO<sub>3</sub><sup>-</sup> assimilation in the presence of NH<sub>4</sub><sup>+</sup> had a  
 225 negligible effect on the solutions and so was not included. Values for the maximum growth rate  
 226 and the half-saturation constants were computed as functions of cell size following data-based  
 227 allometric relationships in Litchman et al. (2007) as in Ward et al. (2012). The effective half-  
 228 saturation constants for DIN uptake with respect to  $\mu_{max}$  were calculated with respect to maximum  
 229 uptake rate  $V_{max}$  and minimum cell quota  $Q_{min}$  from the relationships in Litchman et al. (2007),  
 230 following Verdy et al. (2009) and Ward et al. (2012) (Table A3).

231 Light limitation was parameterized using an exponential form as a function of an instantaneous  
 232 photosynthetic rate and the Chl *a* to Carbon ratio  $\theta$ , following Geider et al. (1997) and Hickman  
 233 et al. (2010):

$$\gamma_{I_i} = 1 - \exp \left( \frac{-\Gamma_i \theta_i}{\mu_{maxP_i} \gamma_{N_i} \gamma_T} \right) \quad (\text{A56})$$

234 Photosynthetic rate  $\Gamma_i$  for each type was computed as a function of photosynthetically active  
 235 radiation  $I(z)$ , the maximum quantum yield of carbon fixation  $\phi$  (mol C mol<sup>-1</sup> photons), and  
 236 the absorption of light by phytoplankton  $a_{P_i}^{\text{chl}}$  (m<sup>2</sup> (mgChl)<sup>-1</sup>) representing a mean value over all  
 237 wavelengths, as:

$$\Gamma_i = \phi a_{P_i}^{\text{chl}} I(z) \quad (\text{A57})$$

238 The Chl:C ( $\theta$ ) varies with photoacclimation, and is computed using a steady-state solution (Geider  
 239 et al. 1997) with maximum ratio  $\theta_{max}$  as:

$$\theta_i = \frac{\theta_{max}}{1 + \frac{\Gamma_i \theta_{max}}{2(\mu_{max} P_i \gamma_{N_i} \gamma_T)}} \quad (\text{A58})$$

240 **Grazing** Three grazer populations consume oxygen, contributing to the formation of the AMZ.  
 241 One population represents microzooplankton bacteriovores and consumes all of the non-photosynthetic  
 242 microbial functional types. A second consumes the small phytoplankton type, and a third consumes  
 243 the large phytoplankton type. Each zooplankton population grows as a linear function of its prey  
 244 biomass with grazing coefficient  $g$  and growth efficiency  $\zeta$  (Armstrong 1994). NH<sub>4</sub><sup>+</sup> is excreted as a  
 245 waste product in proportion to  $(1 - \zeta)$ . Quadratic mortality rate  $m_Z$  represents predation by higher  
 246 trophic levels.

247 Since the diffusive oxygen limitation assumed for the aerobic microbes should not apply to these  
 248 larger organisms, further parameterization of oxygen limitations to zooplankton are required. For the  
 249 population consuming the non-photosynthetic community ( $Z_B$ ), we developed a parameterization  
 250 of zooplankton oxygen consumption that implicitly simulates bacteriovore migration in and out of  
 251 AMZs (Escribano et al. 2009; Wishner et al. 2013; Bianchi et al. 2014). Oxygen demand by the  
 252 zooplankton at any given location is spread vertically above and below that location, and weighted  
 253 by the oxygen concentration at that location, with zero weight if O<sub>2</sub> is below a critical oxygen  
 254 concentration for zooplankton (here, 10 μM; see attached code). This mimicks zooplankton ability  
 255 to breathe above or below the anoxic area, and swim into the area for grazing Escribano et al. (2009).

256 This loss is termed  $f(O_2, Z_B)$  in the differential equation for oxygen for the 2D model (Eqn. A53).  
 257 The two grazing types that consume phytoplankton are not allowed this capability, from the  
 258 perspective that these grazers are adapted to oxygenated surface conditions, and are inhibited  
 259 by oxygen using a saturating form in which their rate of grazing is halved at  $K_{O_2}$ . This oxygen  
 260 inhibition of grazers consuming phytoplankton is a necessary (but not sufficient) condition for the  
 261 formation of the secondary chlorophyll maximum in the model.

262 **Light** Light energy  $I$  decreases with depth according to the attenuation coefficients for water  $k_w$ :

$$I(z) = I_{in} e^{(-zk_w)} \quad (\text{A59})$$

263 **Temperature** All microbial growth, grazing, and mortality rates are represented as a function  
 264 of temperature (non-dimensional  $\gamma_T$ ) using a formulation that follows the Arrhenius equation  
 265 (Dutkiewicz et al. 2015) as:

$$\gamma_T = \tau \exp\left(A_E \left(\frac{1}{T} - \frac{1}{T_0}\right)\right) \quad (\text{A60})$$

266 where  $T$  is the ambient temperature (K),  $T_0$  is a reference temperature,  $A_E$  regulates the temperature  
 267 modification, and  $\tau$  normalizes the maximum value. The model assumes a constant temperature  
 268 profile, an average of the 10°S Pacific Ocean transect from the WOA 2013 climatology. This  
 269 temperature dependency increases microbial rates by a factor of three from the deep to the surface,  
 270 but does not impact solutions qualitatively.

271 **Numerical solution** The biogeochemical model was run ‘offline’ using the above flow field  
 272 with 10 m vertical resolution and 100 km horizontal resolution. Particulate organic matter was  
 273 additionally advected by constant sinking velocity  $w_s$ . The air-sea flux of oxygen is resolved as an  
 274 open boundary with a fixed equilibrium concentration as described above. Solutions were integrated  
 275 until an equilibrium state was reached.

**Table A3:** Additional parameters for 2D idealized AMZ model.

| Parameter                                           | Symbol          | Value             | Units                       |
|-----------------------------------------------------|-----------------|-------------------|-----------------------------|
| <b>Phytoplankton growth:</b>                        |                 |                   |                             |
| Maximum growth rate, $P_S$                          | $\mu_{maxP_S}$  | 0.5               | $d^{-1}$                    |
| $NO_x^-$ half-saturation, $P_S$                     | $K_{NO_xP_S}$   | 3.6               | nM                          |
| $NH_4^+$ half-saturation, $P_S$                     | $K_{NH_4P_S}$   | 1.8               | nM                          |
| Chl $a$ -specific light absorption, $P_S$           | $a_{P_S}^{chl}$ | 0.01              | $m^2 (mgChl)^{-1}$          |
| Maximum growth rate, $P_L$                          | $\mu_{maxP_L}$  | 3                 | $d^{-1}$                    |
| $NO_x^-$ half-saturation, $P_L$                     | $K_{NO_xP_L}$   | 327               | nM                          |
| $NH_4^+$ half-saturation, $P_L$                     | $K_{NH_4P_L}$   | 164               | nM                          |
| Chl $a$ -specific light absorption, $P_L$           | $a_{P_L}^{chl}$ | 0.04              | $m^2 (mgChl)^{-1}$          |
| Maximum quantum yield                               | $\phi$          | 0.04              | $mol\ C\ mol^{-1}\ photons$ |
| Chl:C maximum                                       | $\theta_{max}$  | 0.2               | $g\ Chl\ g^{-1}\ C$         |
| Phytoplankton $O_2$ production                      | $R_{O_2P}$      | 7.3               | $mol\ O_2: mol\ biomass\ N$ |
| <b>Grazing and mortality:</b>                       |                 |                   |                             |
| Grazing coefficient                                 | $g$             | $2\gamma_T$       | $\mu M\ N^{-1}\ d^{-1}$     |
| Grazing efficiency                                  | $\zeta$         | 0.2               | unitless                    |
| Grazer $O_2$ consumption                            | $R_{O_2Z}$      | 7.3               | $mol\ O_2: mol\ biomass\ N$ |
| Oxygen-limiting half-saturation conc. for $Z_{P_i}$ | $K_{O_2}$       | 1                 | $\mu M\ O_2$                |
| Linear mortality rate ( $B$ and $P$ )               | $m_{lin}$       | $0.01\gamma_T$    | $d^{-1}$                    |
| Quadratic mortality rate ( $B$ and $P$ )            | $m_q$           | $0.1\gamma_T$     | $\mu M\ N^{-1}\ d^{-1}$     |
| Quadratic mortality rate ( $Z$ )                    | $m_Z$           | $0.5\gamma_T$     | $\mu M\ N^{-1}\ d^{-1}$     |
| Fraction of mortality to POM vs. DOM                | $f_{mort}$      | 0.5               | unitless                    |
| <b>Temperature dependence:</b>                      |                 |                   |                             |
| Reference temperature                               | $T_0$           | 293.15            | K                           |
| Temperature regulation                              | $A_E$           | -4000             | K                           |
| Temperature normalization                           | $\tau$          | 0.8               | unitless                    |
| <b>Physical parameters:</b>                         |                 |                   |                             |
| Saturated dissolved oxygen concentration            | $O_{2sat}$      | 212               | $\mu M$                     |
| Air-sea $O_2$ transfer coefficient                  | $\kappa_g$      | $3 \cdot 10^{-5}$ | $m\ s^{-1}$                 |
| Air-sea equilibration depth                         | $h_g$           | 100               | m                           |
| Maximum incoming PAR flux                           | $I_{max}$       | 1000              | $W\ m^{-2}$                 |
| PAR attenuation in water                            | $k_w$           | 0.04              | $m^{-1}$                    |
| Mixed-layer attenuation depth                       | $z_{ML}$        | 20                | m                           |
| Horizontal mixing coefficient                       | $\kappa_X$      | $10^3$            | $m^2\ s^{-1}$               |
| Minimum vertical mixing coefficient                 | $\kappa_{Zmin}$ | $10^{-5}$         | $m^2\ s^{-1}$               |
| Maximum vertical mixing coefficient                 | $\kappa_{Zmax}$ | $10^{-2}$         | $m^2\ s^{-1}$               |
| POM sinking rate                                    | $w_s$           | 10                | $m\ d^{-1}$                 |

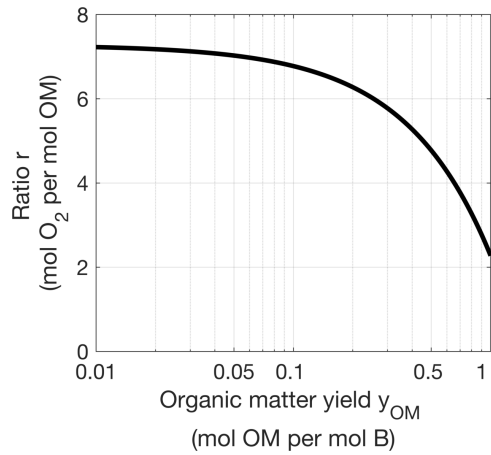

276

277 **Figure A1:** Ratio  $r$  (mol  $O_2$  consumed per mol  $OM$  consumed) as a function of the average aerobic  
 278 heterotrophic organic matter yield  $y_{OM_{B_{hetO}}}$  (mol  $B$  synthesized per mol  $OM$  consumed), for  $d_{OM} = 29.1$ ,  
 279  $d_B = 20$ , and with biomass  $B$  and organic matter  $OM$  accounted for in moles of N. Here,  $r \approx 6.6$  mol  $O_2$   
 280 per mol organic N, or  $r \approx 1$  mol  $O_2$  per mol organic C, reflecting our assumed organic matter stoichiometry.  
 281 This value is close to the “respiratory quotient” for algal material of 0.9 mol  $CO_2$  produced per mol  $O_2$   
 282 (Robinson 2008).



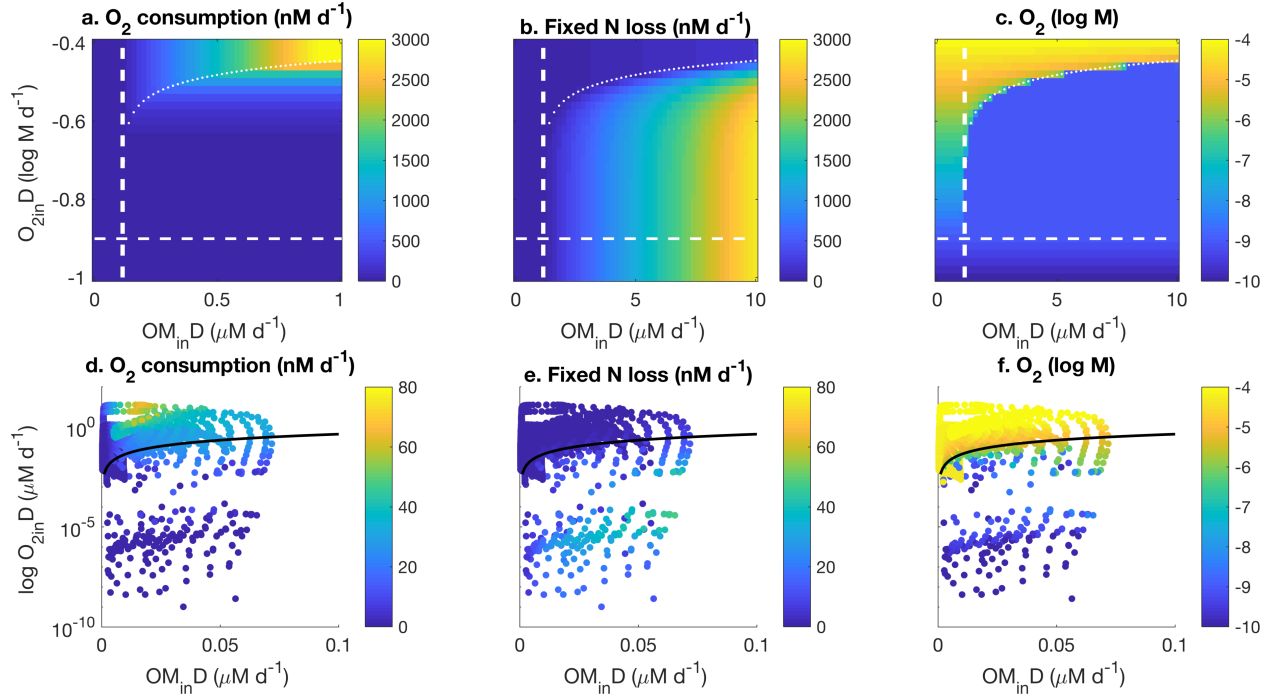

**Figure A2:** Top: Steady state solutions for varying ratios of oxygen and organic matter supply (incoming concentrations  $O_{2in}$  and  $OM_{in}$  and dilution rate  $D$ ) in the virtual chemostat with two metabolisms (a-c), and in the 2D ecosystem model with multiple N-cycling metabolisms (d-f). The curved lines  $\phi = 1$  (white lines in a-c, black lines in d-f) indicates the theoretically predicted onset of sustainable coexistence. The dashed, straight white lines in a-c correspond to the subsistence concentrations of oxygen (for the aerobic heterotrophic metabolism) and organic matter (for both aerobic and anaerobic metabolisms; the aerobic population has a slightly lower but visually indistinguishable subsistence concentration). For the 2D model solutions, the incoming oxygen and organic matter supply rates were calculated at each of the 20,000 grid points, and  $\phi$  is calculated accounting for the divergence of the organic matter flux with  $\phi_{ocean}$ .

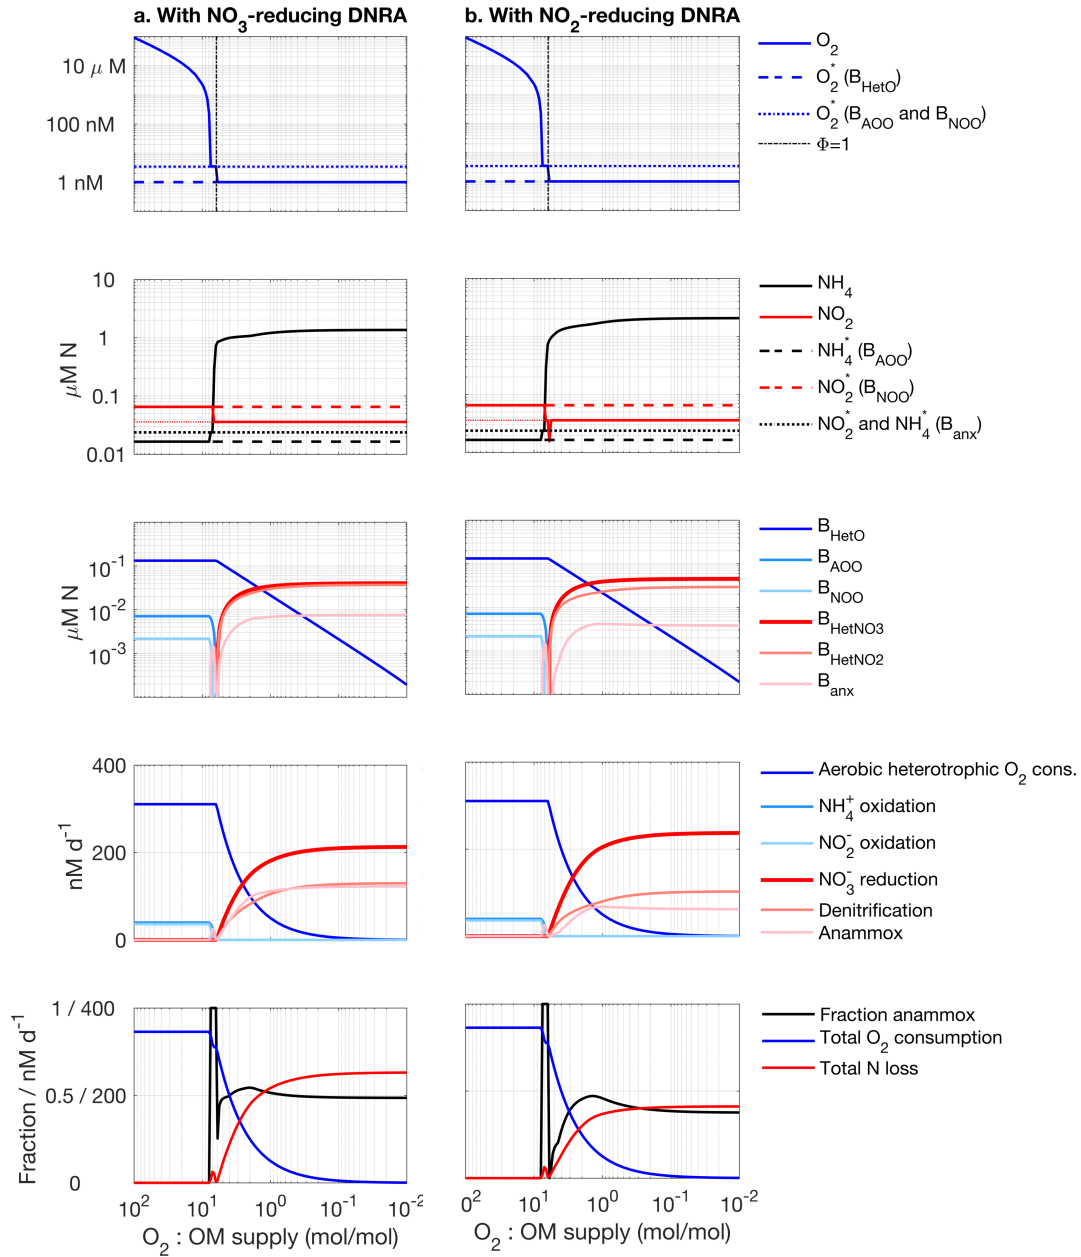

**Figure A3:** Chemostat model solutions when DNRA (dissimilatory nitrate or nitrite reduction to ammonium) is included as a metabolic functional type. We assumed that the organic matter yield for DNRA was equal to the other anaerobic heterotrophic functional types, allowing for its coexistence in the model with other anaerobic heterotrophs competing for organic substrate in the anoxic state. The type using  $\text{NO}_3^-$  as an electron acceptor (column a) competed against the  $\text{NO}_3^-$ -reducing heterotroph  $B_{\text{HetNO}_3}$ , and the type using  $\text{NO}_2^-$  as an electron acceptor (column b) competed against the denitrifying heterotroph  $B_{\text{HetNO}_2}$ .

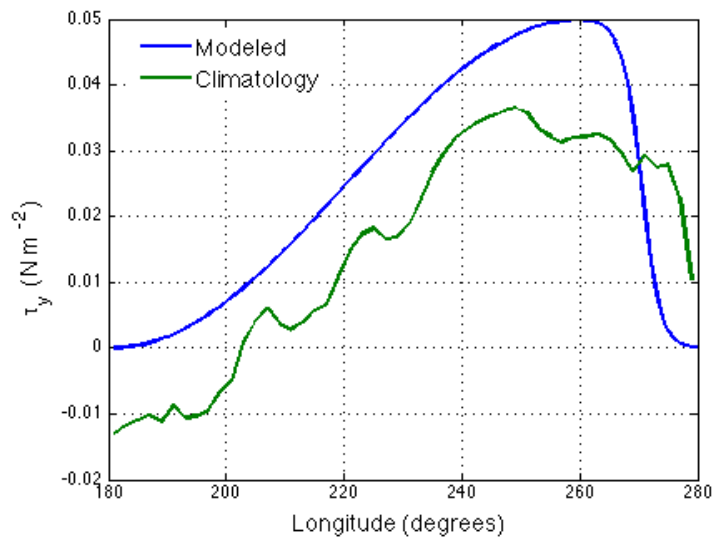

**Figure A4:** The modeled wind stress used as the forcing for the 2D circulation field against climatological mean. The  $y$  component of the annual mean wind stress was averaged meridionally, from the Hellerman and Rosenstein Global Wind Stress Climatology from 180°E to 80°W and 0°S to 10°S (Hellerman and Rosenstein 1983).

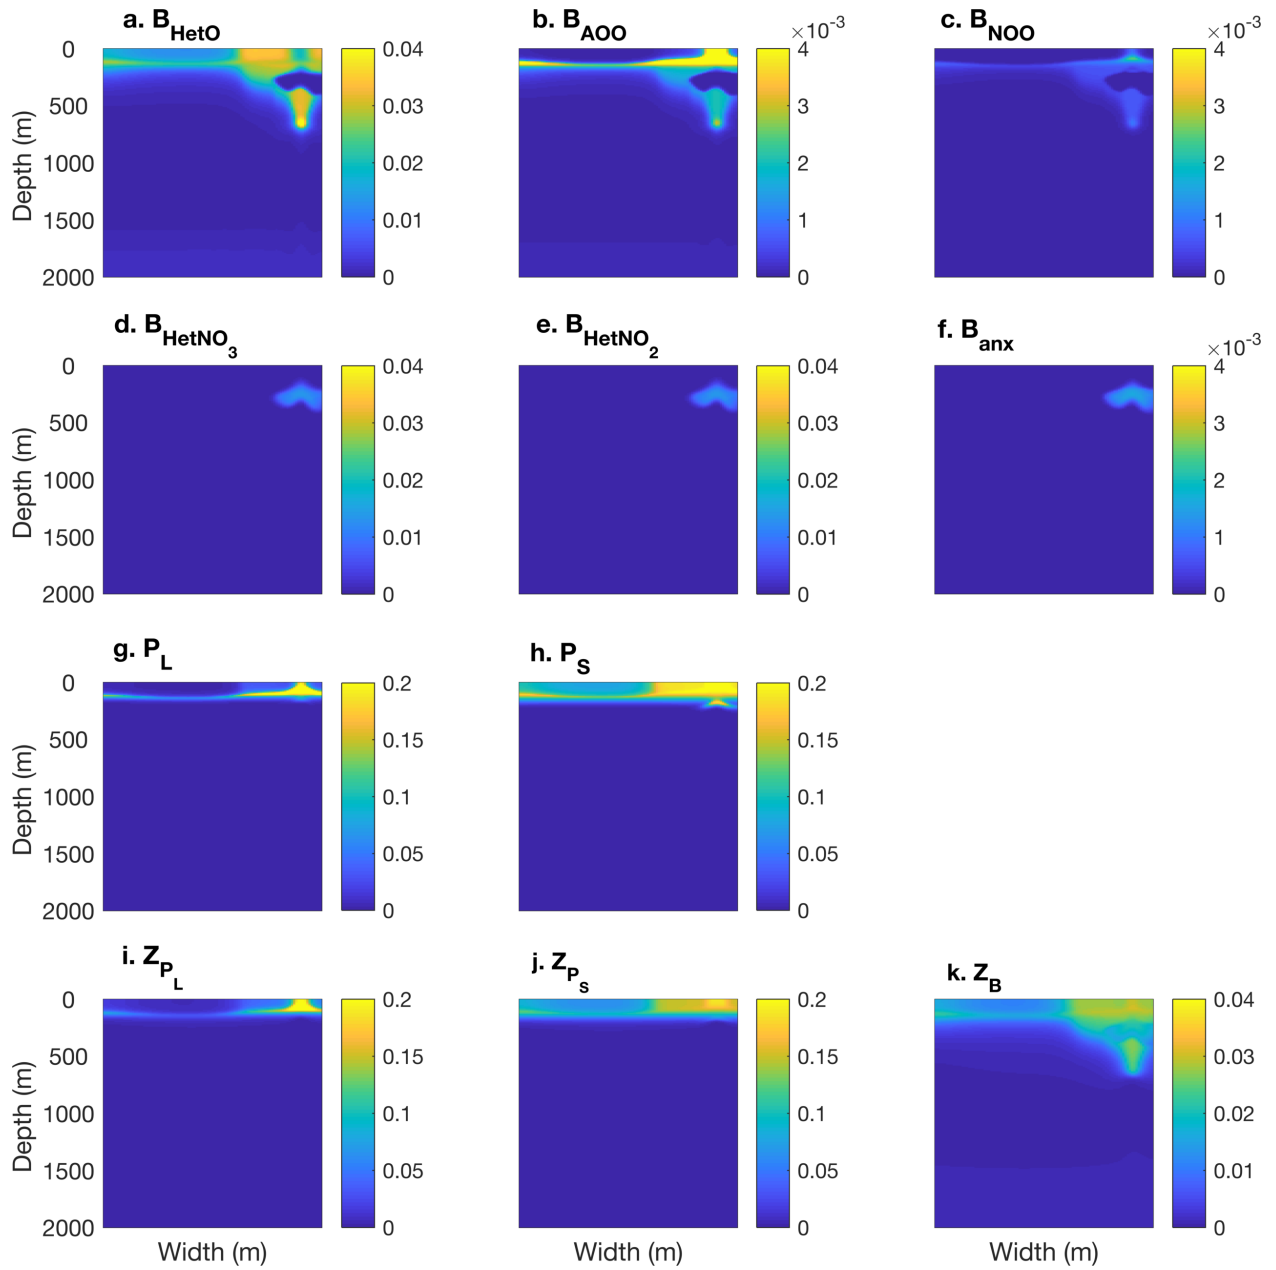

**Figure A5:** Steady state biomasses of the 11 functional type populations in the 2D model. Units for all:  $\mu\text{M N}$ .

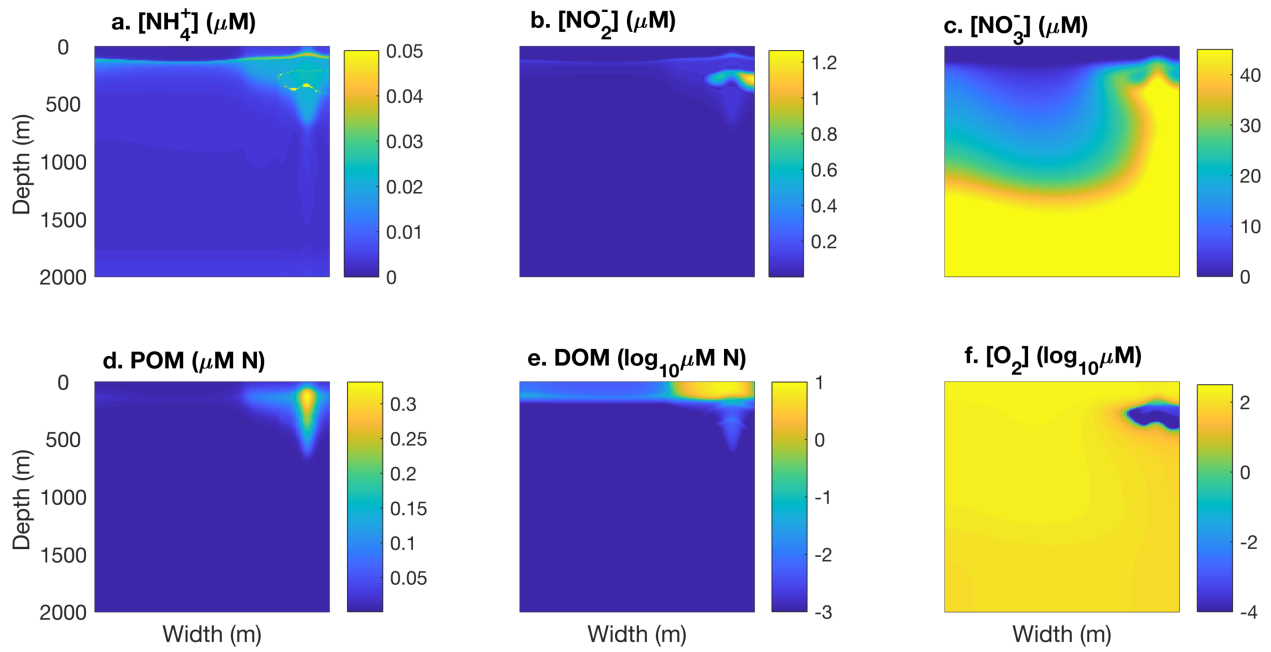

**Figure A6:** Steady state nutrient and oxygen concentrations in the 2D model.

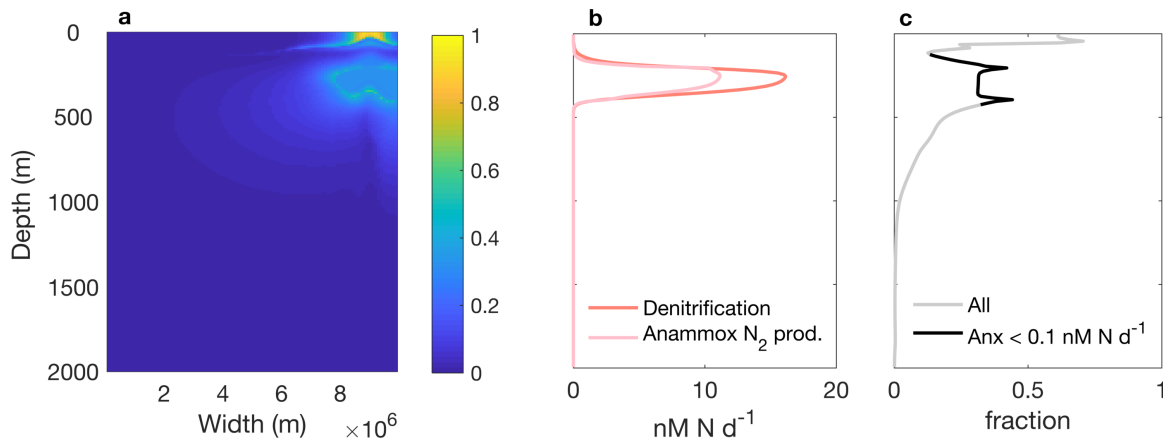

**Figure A7:** The fraction of anammox contribution to total fixed N loss in the 2D model. The fraction over the whole solution (a) decreases to zero (or increases in a few places) where anaerobic activity is insignificant in the aerobic domain, but this reflects the difference of small numbers. Vertical profiles of the rates of fixed nitrogen loss (b) and the fraction of anammox (c) are illustrated at the same location as in Fig. 5.

284 **References**

- 285 Anderson, L. A.. 1995. On the hydrogen and oxygen content of marine phytoplankton. *Deep Sea*  
286 *Res. Part I Oceanogr. Res. Pap.*, **42 (9)**, 1675–1680, doi:10.1016/0967-0637(95)00072-E.
- 287 Armstrong, R. A.. 1994. Grazing limitation and nutrient limitation in marine ecosystems: Steady  
288 state solutions of an ecosystem model with multiple food chains. *Limnol. Oceanogr.*, **39 (3)**,  
289 597–608, doi:10.4319/lo.1994.39.3.0597.
- 290 Babbin, A. R., B. D. Peters, C. W. Mordy, B. Widner, K. L. Casciotti, and B. B. Ward. 2017. Novel  
291 metabolisms support the anaerobic nitrite budget in the Eastern Tropical South Pacific. *Global*  
292 *Biogeochem. Cycles*, **31**, 1–14, doi:10.1002/2016GB005407.
- 293 Bianchi, D., A. R. Babbin, and E. D. Galbraith. 2014. Enhancement of anammox by the excretion of  
294 diel vertical migrators. *Proc. Natl. Acad. Sci.*, **111**, 15 653–15 658, doi:10.1073/pnas.1410790111.
- 295 Bratbak, G., and I. Dundas. 1984. Bacterial dry matter content and biomass estimations. *Appl.*  
296 *Environ. Microbiol.*, **48 (4)**, 755–7.
- 297 Dutkiewicz, S., A. E. Hickman, O. Jahn, W. W. Gregg, C. B. Mouw, and M. J. Follows. 2015. Cap-  
298 turing optically important constituents and properties in a marine biogeochemical and ecosystem  
299 model. *Biogeosciences*, **12 (14)**, 4447–4481, doi:10.5194/bg-12-4447-2015.
- 300 Escribano, R., P. Hidalgo, and C. Krautz. 2009. Zooplankton associated with the oxygen minimum  
301 zone system in the northern upwelling region of Chile during March 2000. *Deep Sea Res. Part II*,  
302 **56**, 1049–1060, doi:10.1016/j.dsr2.2008.09.009.
- 303 Füssel, J., P. Lam, G. Lavik, M. M. Jensen, M. Holtappels, M. Günter, and M. M. M. Kuypers. 2012.  
304 Nitrite oxidation in the Namibian oxygen minimum zone. *ISME J.*, **6**, 1200–9, doi:10.1038/ismej.  
305 2011.178.
- 306 Geider, R. J., H. L. MacIntyre, and T. M. Kana. 1997. Dynamic model of phytoplankton growth  
307 and acclimation: Responses of the balanced growth rate and the chlorophyll a:carbon ratio  
308 to light, nutrient-limitation and temperature. *Mar. Ecol. Prog. Ser.*, **148 (1-3)**, 187–200, doi:  
309 10.3354/meps148187.
- 310 Hellerman, S., and M. Rosenstein. 1983. Normal monthly wind stress over the world ocean with  
311 error estimates. *J. Phys. Oceanogr.*, **13**, 1093–1104, doi:10.1175/1520-0485(1983)013<1093:  
312 NMWSOT>2.0.CO;2.
- 313 Hickman, A. E., S. Dutkiewicz, R. G. Williams, and M. J. Follows. 2010. Modelling the effects of  
314 chromatic adaptation on phytoplankton community structure in the oligotrophic ocean. *Mar. Ecol.*  
315 *Prog. Ser.*, **406**, 1–17, doi:10.3354/meps08588.
- 316 Jensen, M. M., P. Lam, N. P. Revsbech, B. Nagel, B. Gaye, M. S. Jetten, and M. M. Kuypers. 2011.  
317 Intensive nitrogen loss over the Omani Shelf due to anammox coupled with dissimilatory nitrite  
318 reduction to ammonium. *ISME J.*, **5**, 1660–1670, doi:10.1038/ismej.2011.44.

- 319 Kalvelage, T., and Coauthors. 2013. Nitrogen cycling driven by organic matter export in the South  
320 Pacific oxygen minimum zone. *Nat. Geosci.*, **6**, 228–234, doi:10.1038/ngeo1739.
- 321 Lam, P., and Coauthors. 2009. Revising the nitrogen cycle in the Peruvian oxygen minimum zone.  
322 *Proc. Natl. Acad. Sci. U. S. A.*, **106** (12), 4752–7, doi:10.1073/pnas.0812444106.
- 323 LaRowe, D. E., and P. Van Cappellen. 2011. Degradation of natural organic matter: A thermody-  
324 namic analysis. *Geochim. Cosmochim. Acta*, **75** (8), 2030–2042, doi:10.1016/j.gca.2011.01.020.
- 325 Litchman, E., C. A. Klausmeier, O. M. Schofield, and P. G. Falkowski. 2007. The role of functional  
326 traits and trade-offs in structuring phytoplankton communities: scaling from cellular to ecosystem  
327 level. *Ecol. Lett.*, **10**, 1170–81, doi:10.1111/j.1461-0248.2007.01117.x.
- 328 Martens-Habbena, W., P. M. Berube, H. Urakawa, J. R. de la Torre, and D. A. Stahl. 2009. Am-  
329 monia oxidation kinetics determine niche separation of nitrifying Archaea and Bacteria. *Nature*,  
330 **461** (7266), 976–9, doi:10.1038/nature08465.
- 331 Penn, J., T. Weber, and C. Deutsch. 2016. Microbial functional diversity alters the struc-  
332 ture and sensitivity of oxygen deficient zones. *Geophys. Res. Lett.*, **43**, 9773–9780, doi:  
333 10.1002/2016GL070438.
- 334 Rittman, B. E., and P. L. McCarty. 2001. *Environmental Biotechnology: Principles and Applications*.  
335 McGraw-Hill.
- 336 Robinson, C.. 2008. Heterotrophic bacterial respiration. *Microb. Ecol. Ocean.*, D. L. Kirchman, Ed.,  
337 2nd ed., Wiley-Blackwell, 299–334.
- 338 Strous, M., J. J. Heijnen, J. G. Kuenen, and M. S. M. Jetten. 1998. The sequencing batch reactor as  
339 a powerful tool for the study of slowly growing anaerobic ammonium-oxidizing microorganisms.  
340 *Appl. Microbiol. Biotechnol.*, **50**, 589–596.
- 341 Verdy, A., M. Follows, and G. Flierl. 2009. Optimal phytoplankton cell size in an allometric model.  
342 *Mar. Ecol. Prog. Ser.*, **379**, 1–12, doi:10.3354/meps07909.
- 343 Ward, B. a., S. Dutkiewicz, O. Jahn, and M. J. Follows. 2012. A size-structured food-web model for  
344 the global ocean. *Limnol. Oceanogr.*, **57** (6), 1877–1891, doi:10.4319/lo.2012.57.6.1877.
- 345 Wishner, K. F., D. M. Outram, B. A. Seibel, K. L. Daly, and R. L. Williams. 2013. Zooplankton in  
346 the eastern tropical north Pacific: Boundary effects of oxygen minimum zone expansion. *Deep*  
347 *Sea Res. Part I Oceanogr. Res. Pap.*, **79**, 122–140, doi:10.1016/j.dsr.2013.05.012.
- 348 Zakem, E. J., and Coauthors. 2018. Ecological control of nitrite in the upper ocean. *Nat. Commun.*,  
349 **9** (1), 1206, doi:10.1038/s41467-018-03553-w.
- 350 Zimmerman, A. E., S. D. Allison, and A. C. Martiny. 2014. Phylogenetic constraints on elemental  
351 stoichiometry and resource allocation in heterotrophic marine bacteria. *Environ. Microbiol.*,  
352 **16** (5), 1398–1410, doi:10.1111/1462-2920.12329.
- 353 Zumft, W. G.. 1997. Cell biology and molecular basis of denitrification. *Microbiol. Mol. Biol. Rev.*,  
354 **61** (4), 533–616.
